# Supplementary material for: An Fc Gamma Receptor-Mediated Upregulation of the Production of Interleukin 10 by Intravenous Immunoglobulin in Bone-Marrow-Derived Mouse Dendritic Cells Stimulated with Lipopolysaccharide In Vitro
Source: PubMed Central journal article supplement (PMC3703884; doi:10.1155/2013/239320), 2013-06-18
Supplement: 239320.f1.pdf [file 239320.f1.pdf]

## Supplement Data

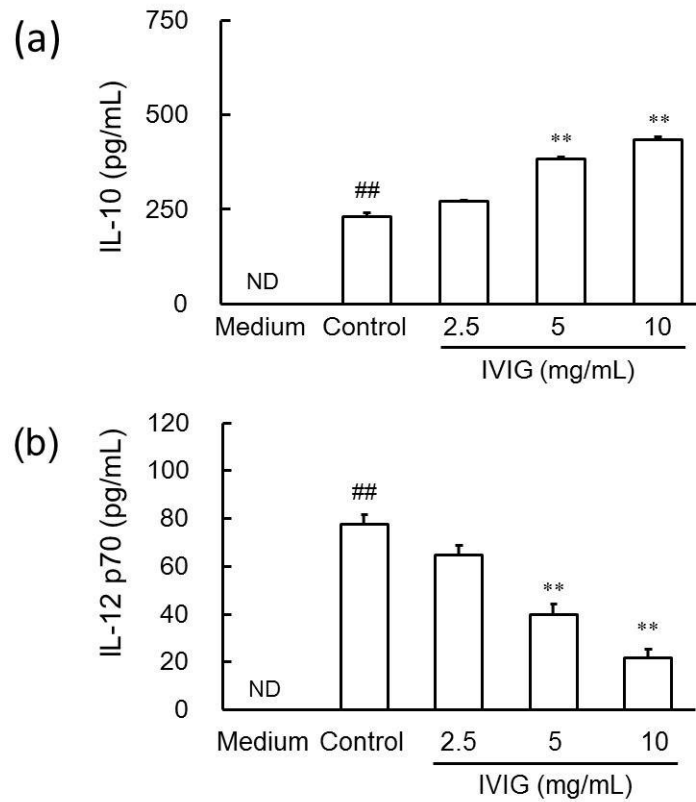

Figure S1: IVIG increased IL-10 production whereas decreased IL-12p70 production in BMDC stimulated with LPS.

Cells were stimulated with LPS (1  $\mu\text{g}/\text{mL}$ ) in the presence of IVIG for 6 h. Cytokine concentrations in the culture medium were determined using respective ELISA kits. (a) Production of IL-10; (b) Production of IL-12p70. Results were expressed as mean $\pm$ SEM (n=3).  $^{\#\#}p<0.01$ , significantly different from the medium alone (without LPS stimulation, Student's t-test);  $^{**}p<0.01$ , significantly different from the Control (LPS stimulation without IVIG, Dunnett's multiple comparison test); ND, IL-10 concentrations were under the lower limit values of the standard ELISA curves. At least three independent experiments were conducted and representative results were shown.

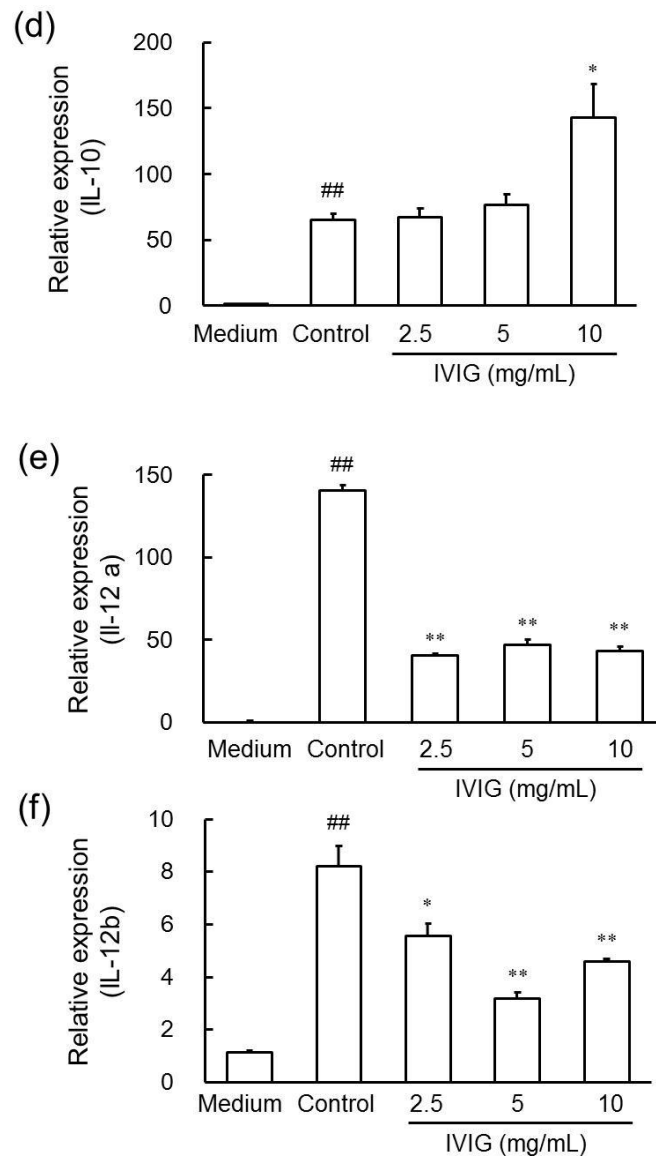

Figure S2: IVIG increased IL-10 mRNA transcription whereas decreased IL-12 mRNA transcription in BMDC stimulated with LPS.

Cells were stimulated with LPS (1  $\mu\text{g}/\text{mL}$ ) in the presence of IVIG for 18 h. The expressions of mRNA for IL-10, IL-12a, and IL-12b were determined by real-time quantitative RT-PCR. Results were expressed as mean $\pm$ SEM (n=3). <sup>##</sup> $p < 0.01$ , significantly different from the medium alone (without LPS stimulation, Student's t-test); <sup>\*</sup> $p < 0.05$ , <sup>\*\*</sup> $p < 0.01$ , significantly different from the Control (LPS stimulation without IVIG, Dunnett's multiple comparison test). At least three independent experiments were conducted and representative results were shown. (a) Expression of IL-10; (b) Expression of IL-12a; (c) Expression of IL-12b.

### Putative targets of IVIG in LPS-stimulated BMDC

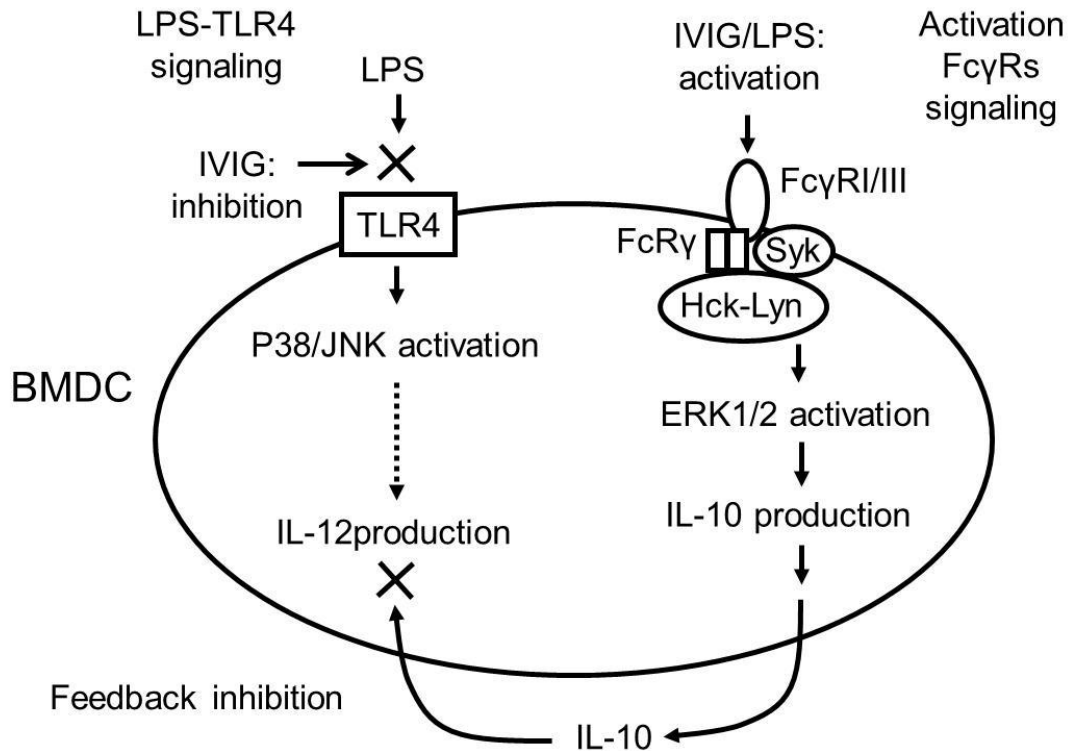

Figure S3: A putative mechanism of IVIG in LPS-stimulated BMDC

(a) After stimulation BMDC with LPS, IVIG inhibits TLR4 signal transduction and reduces p38 MAPK phosphorylation. This may lead to the inhibition of IL-12p70 production. (b) IVIG/LPS complex activates FcγR signaling and induces Syk phosphorylation and ERK1/2 hyper-phosphorylation. This activation results in the up-regulation of IL-10 production and the increased IL-10 contributes to the down-regulation of IL-12p70 production.
